# Supplementary material for: Molecular Characterization of Pneumococcal Surface Protein A (PspA), Serotype Distribution and Antibiotic Susceptibility of Streptococcus pneumoniae Strains Isolated from Pakistan
Source: Springer Nature journal article supplement (doi:10.1007/s40121-018-0195-0), 2018-03-09
Supplement: MOESM1 [file 15523128]

| Antibiotic      | Antibiotic Susceptible | Serotype | PspA family                    | PspA clade                    |                 |   | 18C | Family 2 (N=1), Family 1 (N=1) | Clade 3 (N=1), Clade 1/2 (NA) |
|-----------------|------------------------|----------|--------------------------------|-------------------------------|-----------------|---|-----|--------------------------------|-------------------------------|
| Ampicillin      | 7                      | 19F      | Family 2 (N=9)                 | Clade 3 (N=9)                 | Amikacin        | 1 |     |                                |                               |
| Amoxicillin     | 7                      |          |                                |                               | Amoxicillin     | 2 |     |                                |                               |
| Co-amoxiclav    | 9                      |          |                                |                               | Co-amoxiclav    | 0 |     |                                |                               |
| Cefotaxime      | 7                      |          |                                |                               | Cefotaxime      | 0 |     |                                |                               |
| Ceftriaxone     | 7                      |          |                                |                               | Ceftriaxone     | 0 |     |                                |                               |
| Cefuroxime      | 9                      |          |                                |                               | Cefuroxime      | 1 |     |                                |                               |
| Cephalexin      | 9                      |          |                                |                               | Cephalexin      | 1 |     |                                |                               |
| Chloramphenicol | 8                      |          |                                |                               | Chloramphenicol | 2 |     |                                |                               |
| Fusidic Acid    | 9                      |          |                                |                               | Fusidic Acid    | 1 |     |                                |                               |
| Gentamycin      | 8                      |          |                                |                               | Gentamycin      | 0 |     |                                |                               |
| Linezolid       | 9                      |          |                                |                               | Linezolid       | 2 |     |                                |                               |
| Teicoplanin     | 3                      |          |                                |                               | Teicoplanin     | 1 |     |                                |                               |
| Vancomycin      | 7                      |          |                                |                               | Vancomycin      | 1 |     |                                |                               |
| Vancomycin      | 8                      |          |                                |                               |                 |   |     |                                |                               |
| Ampicillin      | 3                      | 18B      | Family 2 (N=5), Family 1 (N=1) | Clade 3 (N=5), Clade 1/2 (NA) | Amikacin        | 1 |     |                                |                               |
| Amoxicillin     | 1                      |          |                                |                               | Amoxicillin     | 2 |     |                                |                               |
| Co-amoxiclav    | 6                      |          |                                |                               | Co-amoxiclav    | 1 |     |                                |                               |
| Cefotaxime      | 4                      |          |                                |                               | Cefotaxime      | 0 |     |                                |                               |
| Ceftriaxone     | 3                      |          |                                |                               | Ceftriaxone     | 2 |     |                                |                               |
| Cefuroxime      | 4                      |          |                                |                               | Cefuroxime      | 1 |     |                                |                               |
| Cephalexin      | 4                      |          |                                |                               | Cephalexin      | 0 |     |                                |                               |
| Chloramphenicol | 6                      |          |                                |                               | Chloramphenicol | 2 |     |                                |                               |
| Fusidic Acid    | 6                      |          |                                |                               | Fusidic Acid    | 1 |     |                                |                               |
| Gentamycin      | 5                      |          |                                |                               | Gentamycin      | 0 |     |                                |                               |
| Linezolid       | 3                      |          |                                |                               | Linezolid       | 2 |     |                                |                               |
| Teicoplanin     | 6                      |          |                                |                               | Teicoplanin     | 1 |     |                                |                               |
| Vancomycin      | 6                      |          |                                |                               | Vancomycin      | 1 |     |                                |                               |
| Vancomycin      | 6                      |          |                                |                               |                 |   |     |                                |                               |
| Ampicillin      | 2                      | 23F      | Family 2 (N=5)                 | Clade 3 (N=4), Clade 4 (N=1)  | Amikacin        | 1 |     |                                |                               |
| Amoxicillin     | 2                      |          |                                |                               | Amoxicillin     | 1 |     |                                |                               |
| Co-amoxiclav    | 4                      |          |                                |                               | Co-amoxiclav    | 1 |     |                                |                               |
| Cefotaxime      | 5                      |          |                                |                               | Cefotaxime      | 1 |     |                                |                               |
| Ceftriaxone     | 5                      |          |                                |                               | Ceftriaxone     | 1 |     |                                |                               |
| Cefuroxime      | 2                      |          |                                |                               | Cefuroxime      | 1 |     |                                |                               |
| Cephalexin      | 2                      |          |                                |                               | Cephalexin      | 0 |     |                                |                               |
| Chloramphenicol | 5                      |          |                                |                               | Chloramphenicol | 1 |     |                                |                               |
| Fusidic Acid    | 5                      |          |                                |                               | Fusidic Acid    | 1 |     |                                |                               |
| Gentamycin      | 4                      |          |                                |                               | Gentamycin      | 0 |     |                                |                               |
| Linezolid       | 1                      |          |                                |                               | Linezolid       | 1 |     |                                |                               |
| Teicoplanin     | 5                      |          |                                |                               | Teicoplanin     | 1 |     |                                |                               |
| Vancomycin      | 5                      |          |                                |                               | Vancomycin      | 1 |     |                                |                               |
| Vancomycin      | 5                      |          |                                |                               |                 |   |     |                                |                               |
| Ampicillin      | 3                      | 14       | Family 2 (N=2), Family 1 (N=2) | Clade 3 (N=2), Clade 1/2 (NA) | Amikacin        | 0 |     |                                |                               |
| Amoxicillin     | 2                      |          |                                |                               | Amoxicillin     | 1 |     |                                |                               |
| Co-amoxiclav    | 2                      |          |                                |                               | Co-amoxiclav    | 0 |     |                                |                               |
| Cefotaxime      | 2                      |          |                                |                               | Cefotaxime      | 0 |     |                                |                               |
| Ceftriaxone     | 3                      |          |                                |                               | Ceftriaxone     | 0 |     |                                |                               |
| Cefuroxime      | 1                      |          |                                |                               | Cefuroxime      | 0 |     |                                |                               |
| Cephalexin      | 1                      |          |                                |                               | Cephalexin      | 1 |     |                                |                               |
| Chloramphenicol | 2                      |          |                                |                               | Chloramphenicol | 1 |     |                                |                               |
| Fusidic Acid    | 4                      |          |                                |                               | Fusidic Acid    | 1 |     |                                |                               |
| Gentamycin      | 0                      |          |                                |                               | Gentamycin      | 0 |     |                                |                               |
| Linezolid       | 4                      |          |                                |                               | Linezolid       | 1 |     |                                |                               |
| Teicoplanin     | 4                      |          |                                |                               | Teicoplanin     | 1 |     |                                |                               |
| Vancomycin      | 4                      |          |                                |                               | Vancomycin      | 0 |     |                                |                               |
| Vancomycin      | 4                      |          |                                |                               |                 |   |     |                                |                               |
| Ampicillin      | 4                      | 10A      | Family 2 (N=4)                 | Clade 3 (N=4)                 | Amikacin        | 1 |     |                                |                               |
| Amoxicillin     | 1                      |          |                                |                               | Amoxicillin     | 1 |     |                                |                               |
| Co-amoxiclav    | 4                      |          |                                |                               | Co-amoxiclav    | 1 |     |                                |                               |
| Cefotaxime      | 2                      |          |                                |                               | Cefotaxime      | 1 |     |                                |                               |
| Ceftriaxone     | 2                      |          |                                |                               | Ceftriaxone     | 1 |     |                                |                               |
| Cefuroxime      | 1                      |          |                                |                               | Cefuroxime      | 1 |     |                                |                               |
| Cephalexin      | 1                      |          |                                |                               | Cephalexin      | 1 |     |                                |                               |
| Chloramphenicol | 2                      |          |                                |                               | Chloramphenicol | 1 |     |                                |                               |
| Fusidic Acid    | 4                      |          |                                |                               | Fusidic Acid    | 1 |     |                                |                               |
| Gentamycin      | 2                      |          |                                |                               | Gentamycin      | 0 |     |                                |                               |
| Linezolid       | 0                      |          |                                |                               | Linezolid       | 1 |     |                                |                               |
| Teicoplanin     | 4                      |          |                                |                               | Teicoplanin     | 1 |     |                                |                               |
| Vancomycin      | 3                      |          |                                |                               | Vancomycin      | 1 |     |                                |                               |
| Vancomycin      | 3                      |          |                                |                               |                 |   |     |                                |                               |
| Ampicillin      | 1                      | 3        | Family 2 (N=2)                 | Clade 3 (N=2)                 | Amikacin        | 0 |     |                                |                               |
| Amoxicillin     | 2                      |          |                                |                               | Amoxicillin     | 1 |     |                                |                               |
| Co-amoxiclav    | 2                      |          |                                |                               | Co-amoxiclav    | 0 |     |                                |                               |
| Cefotaxime      | 2                      |          |                                |                               | Cefotaxime      | 1 |     |                                |                               |
| Ceftriaxone     | 2                      |          |                                |                               | Ceftriaxone     | 1 |     |                                |                               |
| Cefuroxime      | 1                      |          |                                |                               | Cefuroxime      | 1 |     |                                |                               |
| Cephalexin      | 1                      |          |                                |                               | Cephalexin      | 1 |     |                                |                               |
| Chloramphenicol | 2                      |          |                                |                               | Chloramphenicol | 1 |     |                                |                               |
| Fusidic Acid    | 2                      |          |                                |                               | Fusidic Acid    | 1 |     |                                |                               |
| Gentamycin      | 2                      |          |                                |                               | Gentamycin      | 0 |     |                                |                               |
| Linezolid       | 1                      |          |                                |                               | Linezolid       | 1 |     |                                |                               |
| Teicoplanin     | 2                      |          |                                |                               | Teicoplanin     | 1 |     |                                |                               |
| Vancomycin      | 2                      |          |                                |                               | Vancomycin      | 1 |     |                                |                               |
| Vancomycin      | 2                      |          |                                |                               |                 |   |     |                                |                               |
| Ampicillin      | 1                      |          |                                |                               | Amikacin        | 1 |     |                                |                               |
| Amoxicillin     | 2                      |          |                                |                               | Amoxicillin     | 1 |     |                                |                               |
| Co-amoxiclav    | 2                      |          |                                |                               | Co-amoxiclav    | 0 |     |                                |                               |
| Cefotaxime      | 2                      |          |                                |                               | Cefotaxime      | 1 |     |                                |                               |
| Ceftriaxone     | 2                      |          |                                |                               | Ceftriaxone     | 1 |     |                                |                               |
| Cefuroxime      | 1                      |          |                                |                               | Cefuroxime      | 1 |     |                                |                               |
| Cephalexin      | 1                      |          |                                |                               | Cephalexin      | 1 |     |                                |                               |
| Chloramphenicol | 2                      |          |                                |                               | Chloramphenicol | 1 |     |                                |                               |
| Fusidic Acid    | 2                      |          |                                |                               | Fusidic Acid    | 1 |     |                                |                               |
| Gentamycin      | 2                      |          |                                |                               | Gentamycin      | 0 |     |                                |                               |
| Linezolid       | 1                      |          |                                |                               | Linezolid       | 1 |     |                                |                               |
| Teicoplanin     | 2                      |          |                                |                               | Teicoplanin     | 1 |     |                                |                               |
| Vancomycin      | 2                      |          |                                |                               | Vancomycin      | 1 |     |                                |                               |
| Vancomycin      | 2                      |          |                                |                               |                 |   |     |                                |                               |
